# Supplementary material
Source: PubMed Central journal article supplement (PMC6002734)
Supplement: JVI.02225-17_zjv013183630s1.pdf [file JVI.02225-17_zjv013183630s1.pdf]

1 **Supplementary figure 1**

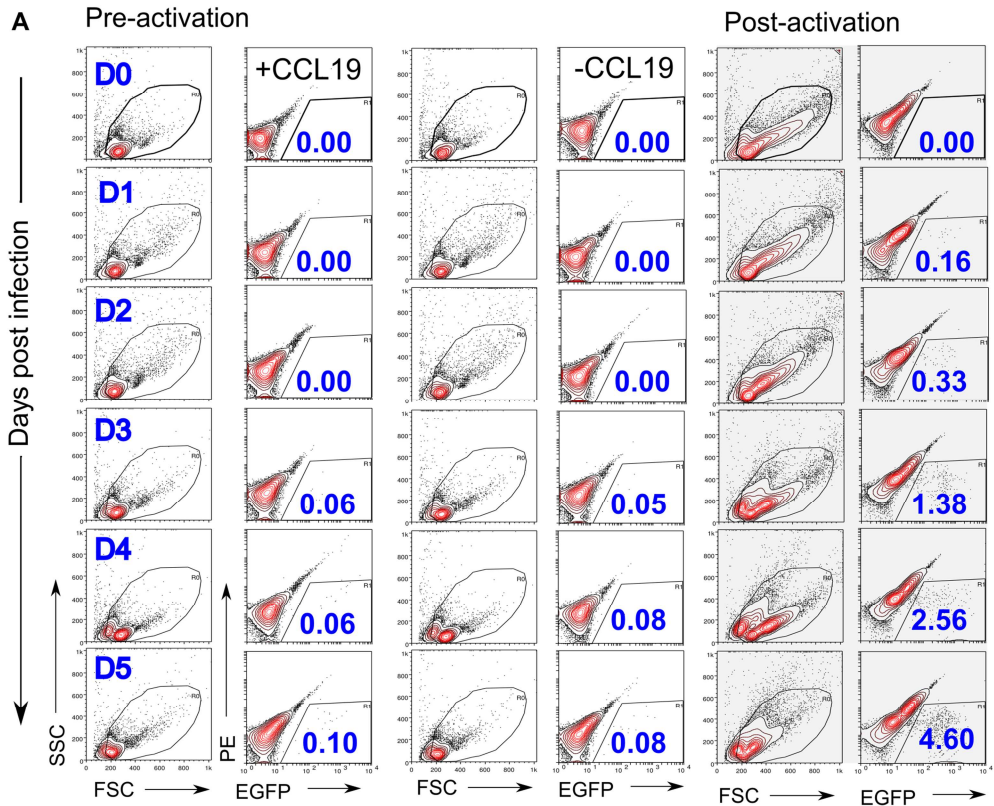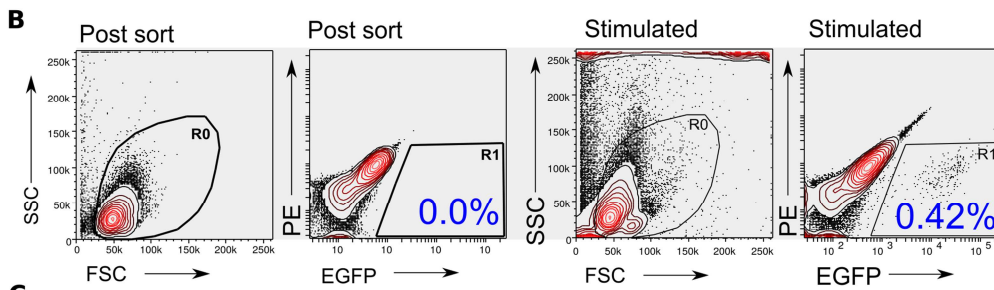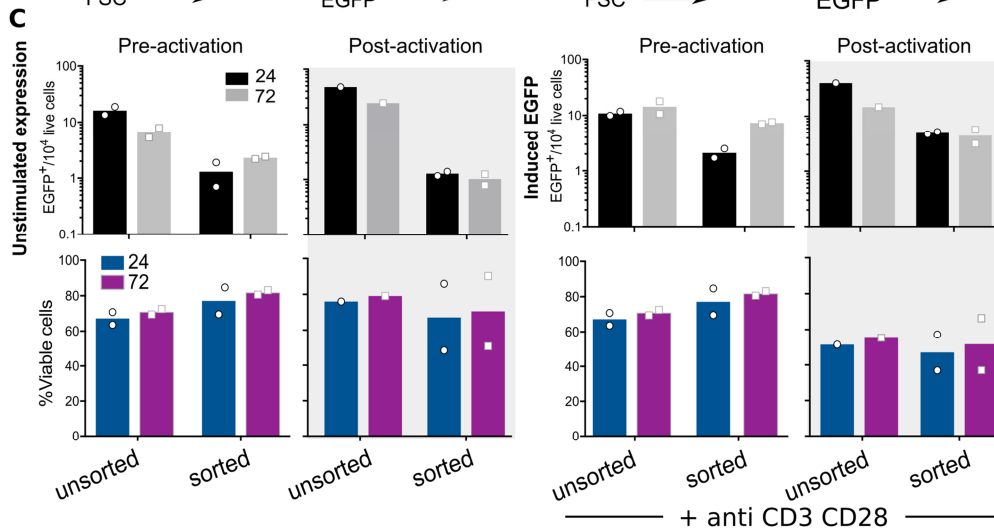

3 **Figure S1: Kinetics of EGFP expression after infection of T cells in pre- and post-**  
4 **activation models of latency**

5 A) Pre-activation latency was established by infection of resting CD4+ T cells cultured alone or  
6 with CCL19. Post-activation latency was established by activating naïve T cells with  
7 antiCD3/CD28 for 7 days before infection. Both T cells were infected with X4-EGFP virus and  
8 forward and side scatter (FSC and SSC) and EGFP expression monitored daily for 5 days.  
9 Higher levels of EGFP expression were found in post-activation compared to pre-activation  
10 latency. B) Cells from post-activation cultures were sorted at day 7 post infection and EGFP-  
11 cells were analysed by flow cytometry immediately or following stimulation with anti CD3/CD28  
12 for 3 days (stimulated). FSC and SSC and EGFP expression are shown. C) EGFP- negative  
13 cells were collected after sorting and cultured for 24 (black) and 72 hours (grey) and compared  
14 to unsorted cultures stimulated with anti-CD3/anti-CD28. EGFP expression and viability of cells  
15 are shown. Data represents 2 matched donors from one experiment. Percentage of viable cells  
16 in unsorted and sorted cells cultured for 72 hours (squares, unstimulated expression, purple) or  
17 following anti-CD3/ anti-CD28 stimulation (+aCD3/CD28) at 24hrs (blue circles, bar). The post-  
18 activation latency is shown by grey shading.

19

20 Supplementary figure 2

21

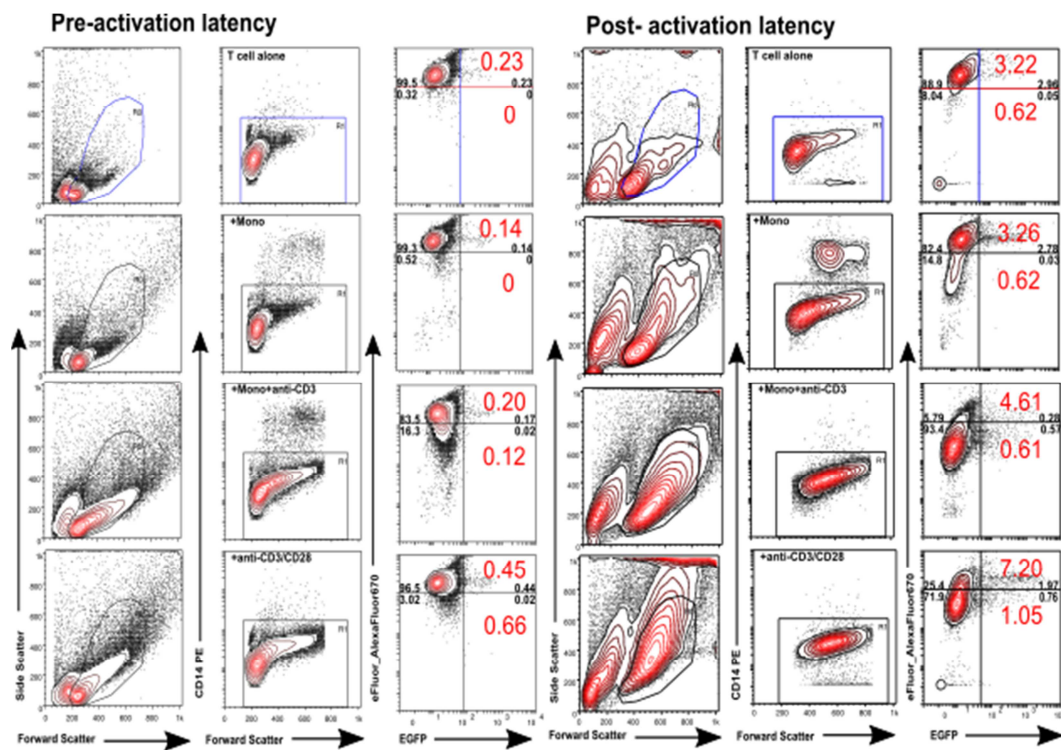

22

23 **Figure S2: EGFP expression following activation in proliferating and non-proliferating**  
24 **latently infected cells.**

25 The gating strategy to measure EGFP expression and cellular proliferation in latently infected  
26 cells post stimulation is shown. Live cells were defined using forward versus side scatter.  
27 Monocytes were excluded by gating for CD14 PE negative. The EGFP expression was  
28 measured against proliferation detected by reduced AlexaFluor 670. Data shown as the  
29 percentage of EGFP expression in top right as eFluor670<sup>hi</sup>EGFP<sup>+</sup>, bottom right as  
30 eFluor670<sup>lo</sup>EGFP<sup>+</sup>, top left eFluor670<sup>hi</sup>EGFP<sup>-</sup> and bottom left eFluor670<sup>lo</sup>EGFP<sup>-</sup>. Plots are  
31 representative of EGFP expression and proliferation on T cell alone (unstim), monocytes,  
32 monocytes/anti-CD3 and anti-CD3/anti-CD28 stimulation. The plots show the same donor  
33 tested in both pre- and post-activation latency models. The percentage of EGFP in proliferating

34 (eFlour670<sup>lo</sup>) and non-proliferating (eFlour670<sup>hi</sup>) cells is shown in red. Scatterplots represent  
35 analyses of 1 of 6 donors.

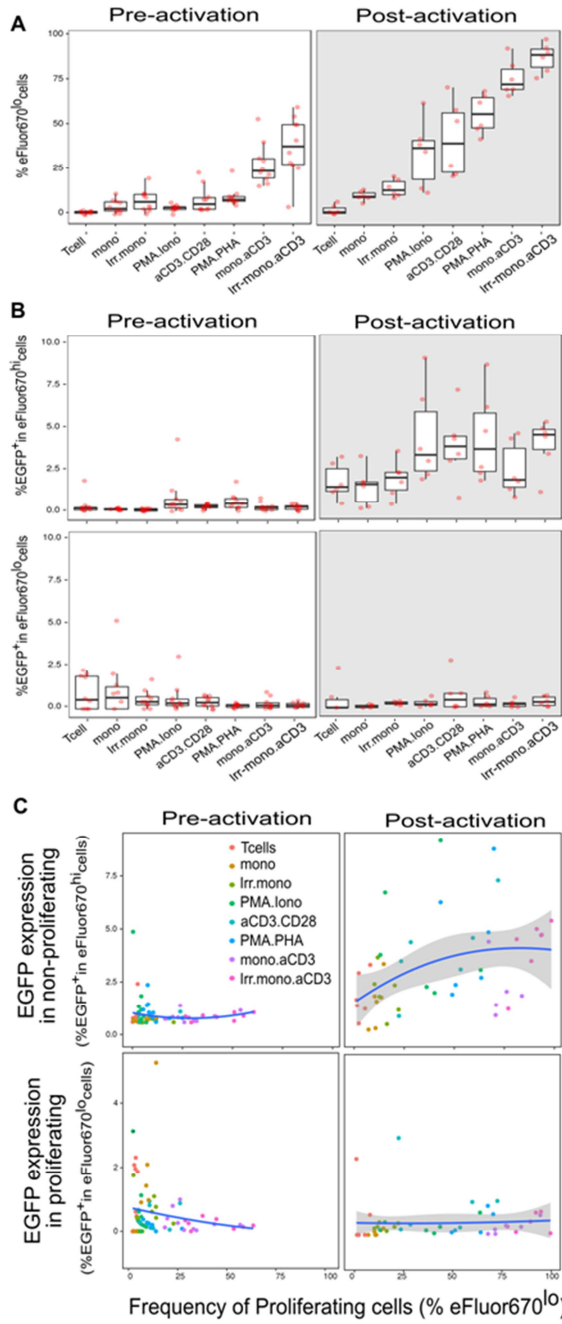

37

38 **Figure S3: EGFP expression in proliferating and non-proliferating latently infected cells**

39 **following activation.**

40 **A)** Percentage of proliferating (eFluor670<sup>lo</sup>) cells in response to different activating stimuli in pre-  
41 and post- activation latency, **B)** Distribution of EGFP expression in non-proliferating  
42 (eFluor670<sup>hi</sup>) and proliferated (eFluor670<sup>lo</sup>) cells. Each point represents a single donor. The  
43 boxplots show 25 and 75 percentiles, median and range. Grey shades represent latently  
44 infected cells in the post-activation latency model. **C)** The frequency of EGFP expressed cells  
45 following stimulation in proliferating (eFluor670<sup>lo</sup>) and non-proliferating (eFluor670<sup>hi</sup>) cells plotted  
46 against the frequency of proliferated (eFluor670<sup>lo</sup>) cells in post- and pre-activation model. Each  
47 point represents a single donor.

48 Supplementary figure 4

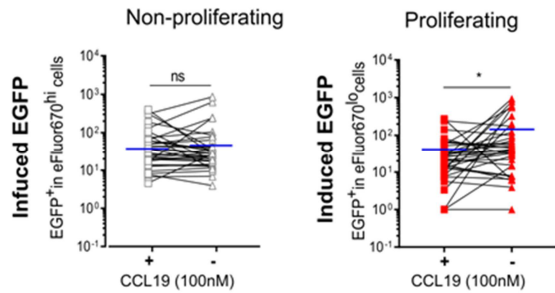

49

50 **Figure S4: Effect of CCL19 on induced HIV expression in non-proliferating and**  
51 **proliferating latently infected T cells.**

52 Pre-activation latency was established in resting CD4<sup>+</sup> T cells with and without CCL19 (100nM).  
53 Antiretrovirals were added 48hrs post infection. The EGFP<sup>-</sup> cells were sorted and cultured with  
54 activation stimulus for 3 days. The induced EGFP expression was determined in the 2  
55 populations by FCM. The number of EGFP expressing cells in non-proliferating (eFluor670<sup>hi</sup>)  
56 and proliferating (eFluor670<sup>lo</sup>) cells in the pre-activation latency model with CCL19 (square) or  
57 without (triangle) are shown.  $p^* \leq 0.05$ , as determined by Wilcoxon matched pairs signed rank  
58 test. Each point represents a single donor in a matched condition. The median is shown by blue  
59 line.

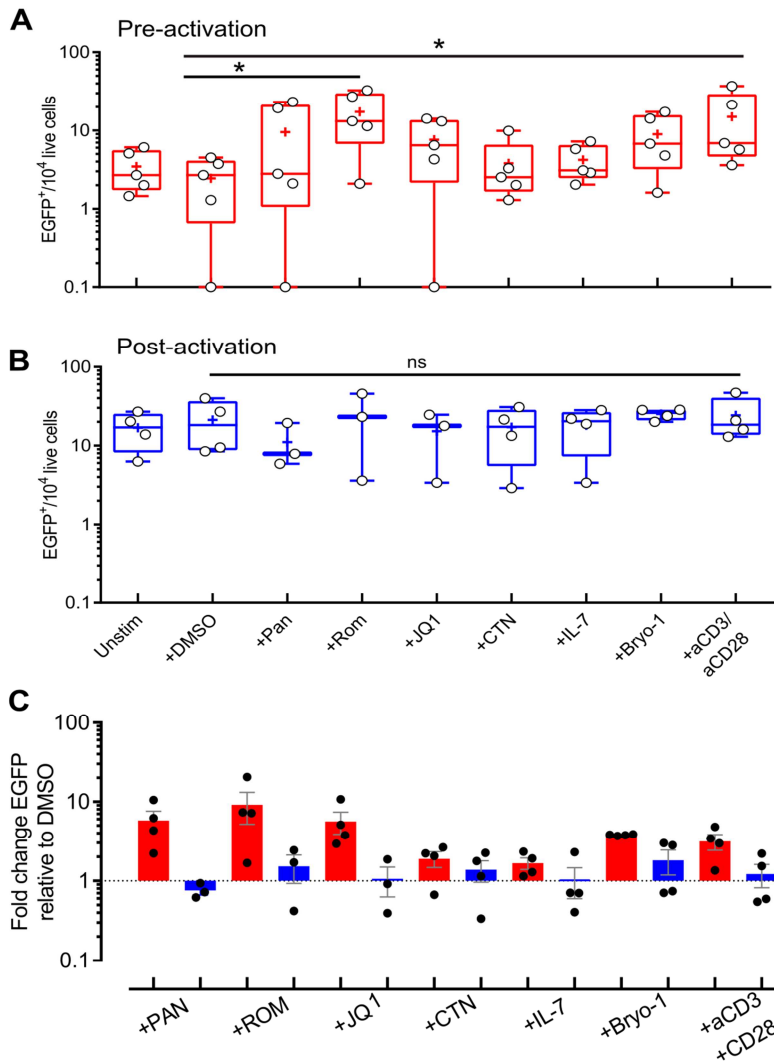

61

62 **Figure S5: Response to LRA in pre- and post-activation latency.**

63 Non-EGFP expressing cells sorted from the pre- activation **A**) and post-activation models **B**)

64 were co-cultured with a panel of LRAs including the HDACs inhibitors panobinostat (30nM) and

65 romidepsin (40nM), BET inhibitor JQ1 (10nM), PKC agonist Bryostat-1 (10nM), histone

66 methyltransferase inhibitor; Chaetocin, CTN (10nM), and  $\gamma$ -cytokine IL-7 (50ng/ml).

67 AntiCD3/antiCD28 beads (at 1:1 ratio) were used as a positive control. To measure the

68 background expression cells were also cultured in DMSO or media containing antivirals only



69 (unstim). EGFP expression was measured 72hrs post activation. Each point represents mean  
70 values of two technical replicates. The boxplots show 25 and 75 percentiles, median and range.  
71 **C)** Fold change in EGFP expression in sorted non-EGFP expressing cells from pre-activation  
72 (red) and post-activation (blue) following stimulation with LRA. Fold change was determined  
73 against DMSO control. Each dot indicates an individual donor, error bars represents mean  
74  $\pm$ SEM.  $p^* \leq 0.05$ , as determined by Student's t-test on log transformed data.
